# Supplementary material for: MICA*019 Allele and Soluble MICA as Biomarkers for Ankylosing Spondylitis in Taiwanese
Source: MDPI journal article supplement (doi:10.3390/jpm11060564), 2021-06-16
Supplement: s1 [file s1]

## Online Supplementary Information

Supplemental Methods.

Supplemental Table S1. Demographical information of Taiwanese AS patients and normal healthy controls

Supplemental Table S2. *MICA* non-synonymous cSNPs and major alleles identified in Taiwanese normal healthy controls and AS patients

Supplemental Table S3. The LD ( $r^2$ ) between cSNPs and *MICA* alleles in Taiwanese normal healthy controls and AS patients

Supplemental Table S4. Association of *MICA* cSNP genotypes and alleles with AS susceptibility in Taiwanese

Supplemental Table S5. Association of *MICA* cSNP genotypes and alleles with HLA-B27 positivity in AS patients

Supplemental Table S6. Comparison of *MICA* alleles between AS patients and normal controls positive for HLA-B27

Supplemental Table S7. Comparison of *MICA* alleles between AS patients and normal controls negative for HLA-B27

### Supplemental Methods.

#### DNA sequence analysis of *MICA* gene

Because *MICA* is highly homologous to *MICB* at nucleotide levels, we designed and validated *MICA* gen×10-specific PCR primers for the specific amplification of *MICA* gene. PCR was carried out to amplify the *MICA*-specific genomic DNA containing exon 2, 3, 4, and 5 using the sense primer (5'-CAA GAC CTT CCT TCC ACC ACC T-3') and antisense primer (5'-CCT TGT CAC CAA CAT GCC TAT CTT T-3'). The PCR products of *MICA* DNA fragment (2352 base pairs) were treated with ExoSAP-IT (Affymetrix, Santa Clara, CA) and subsequently assessed by Sanger sequencing on an ABI 3730xl DNA Analyzer using BigDye v3.1 Sequencing kit (Applied Biosystems) and three sequencing primers to cover three *MICA* exons (sequencing primer #1: 5'-CAG CAG ACC TGT GTG TTA A-3' for the exon 2; sequencing primer #2: 5'-GGT GAT GGG TTC GGG AA-3' for the exon 3; and sequencing primer #3: 5'-TTC CTC TCC CCT CCT TAG A-3' for the exon 4).

IMGT/HLA database  
([ftp://ftp.ebi.ac.uk/pub/databases/ipd/imgt/hla/fasta/MICA\\_nuc.fasta](ftp://ftp.ebi.ac.uk/pub/databases/ipd/imgt/hla/fasta/MICA_nuc.fasta), release date: 2020)  
are used to assign 105 *MICA* haplotypes or alleles.

#### Determination of soluble *MICA* (sMICA) levels in serum samples

Serum samples of normal healthy controls and AS patients were used in ELISA analyses of sMICA. Serum sMICA levels were determined in triplicates using a sandwich *MICA* DuoSet ELISA kit (R&D Systems, Minneapolis, MN, USA) according to the manufacturer's instructions.

#### Generation of human *MICA* gene expression constructs

*MICA* cDNAs of peripheral blood mixed mononuclear cells from the carriers of major *MICA* alleles (*MICA*\*002, *MICA*\*008, *MICA*\*010, and *MICA*\*019) in Taiwanese were amplified by RT-PCR using the upper primer 5'-CA GCA GAA TTC GTC GGG GCC ATG GGG CTG GGC CCG GTC-3' and the lower primer 5'-CAG GGA TCC CTA GGC GCC CTC AGT GGA G-3' (for *MICA*\*008 allele, the lower primer 5'-CAG GGA TCC CTA GGT GCC CTC AGT GGA G-3' were used instead). *MICA* cDNAs were subsequently cloned into the lentiviral vector pCDH-CMV-EF1-copGFP (Systems Biosciences). Pseudo-lentiviral particles were produced and subsequently used to transduce target cells according to the vendor's instructions (System Biosciences)

#### Generation of cell lines expressing *MICA* alleles

The C1R cells (ATCC#CRL-1573, Manassas, VA) and LCL-721.221 cells (ATCC#CRL-1855) were maintained in the DMEM medium supplemented with 10% fetal calf serum and 1% GlutaMax (Invitrogen) in 5% CO<sub>2</sub>. Transduced cells were sorted on vFACSAria III cytometer (BD Biosciences, Mountain View, CA) for copGFP-positive cell population. Established stable C1R cell lines expressing empty vector, *MICA\*002*, *MICA\*008*, *MICA\*010*, or *MICA\*019* alleles were continuously cultured and monitored for GFP expressions before analyses of sMICA, exosomal MICA, and cellular MICA.

### **Flow Cytometry analyses of membranex10-bound MICA**

To detect surface MICA, the parental C1R and LCL-721.221 cells along with their respective stable clones expressing empty vector, *MICA\*002*, *MICA\*008*, *MICA\*010*, and *MICA\*019* were stained with APC-conjugated anti-human MICA/MICB (Biolegend, San Diego, CA, USA) for 30 min at 4°C and analyzed on a EC800 (SONY) system. The transduced GFP<sup>+</sup> cells were gated for MICA expression analyses while the parental cells (GFP<sup>-</sup>) were used as the negative control for transduction.

### **Western analyses and detection of sMICA, exosomal MICA, and cellular MICA**

All cells were cultured in RPMI containing 1% FBS for 24-hrs before the harvest of cells and cell-free culture supernatants. To isolate exosomes, 24-hr cell-free culture supernatants were subjected to centrifugation at 10,000 ×g for 1 hr and the resultant supernatants were further subjected to ultracentrifugation at 100,000 ×g for 1 hr. The ultracentrifugation pellets containing exosomes were subsequently used for Western blot analyses of exosomal MICA. The ultracentrifugation supernatant fractions containing sMICA were immunoprecipitated with anti-human MICA/MICA (Biolegend) and protein G Mag sepharose Xtra beads (GE Healthcare) to concentrate sMICA for Western blot analysis. Total cell lysates were solubilized in lysis buffer (1% Triton X-100, 50 mM Tris-Cl, pH 7.4, 300 mM NaCl, 5 mM EDTA, 0.02% NaN<sub>3</sub>) containing complete protease inhibitors (Roche Applied Science) for 30 min on ice. The immunoprecipitation-concentrated sMICA, the isolated exosomes, and total cell lysate were subjected to gel-electrophoresis on 4–12% gradient SDS-PAGE under reducing conditions and transferred to PVDF membranes (GE Healthcare). The membrane was blocked by 5% BSA in PBST and MICA proteins were detected by incubating the membrane with rabbit anti-human MICA antibody (Abcam) at 4 °C overnight, followed by incubation with alkaline phosphatasx10-conjugated goat anti-rabbit secondary antibodies at room temperature for 1 hr. MICA proteins were visualized using ECF<sup>TM</sup> substrates (GE Healthcare) and then detected by imaging system Typhoon FLA 9500 (GE Healthcare). The blots were further rx10-probed with the primary antibodies against exosome marker CD55 (Santa Cruz Biotechnology), ER marker calnexin (Cell Signaling Technology) or cytoplasmic protein GAPDH (Epitomics) followed by their respective alkaline phosphatasx10-conjugated secondary antibodies.

### **Statistical analysis**

We carried out singlrx10-locus analyses of *MICA* cSNPs to compare distributions of genotypes and alleles between normal healthy controls and AS patients. Three chi-square tests: the genotype test, the allele test, and the Cochran-Armitage trend test were performed, and associations with cSNPs were identified using the SAS/Genetics software package release 8.2 (SAS Institute, Cary, NC). Based on the identified risk allele, p-values, odds ratios (ORs), and 95% confidence interval (CIs) were then calculated. To account for the multiple testing corrections, the FDR-corrected p-values were generated by using False Discovery Rate (FDR) correction that accomplished by the modified version of FDR programmed in QVALUE software (<http://genomics.princeton.edu/storeylab/qvalue/> (accessed on 2020 October 1st)). Linkage disequilibrium (LD) between marker loci or cSNPs was measured and haplotype blocks were constructed using Haploview 4.2 (Broad Institute, Cambridge, MA, USA; <http://www.broad.mit.edu/mpg/haploview> (accessed on 2020 October 1st)). Association of the estimated haplotypes or alleles and disease status

were tested in logistic regression models. To investigate the genetic association with clinical characteristics, we controlled for each of clinical characteristics and performed stepwise logistic regression analyses. Unpaired t-tests of GraphPad Prism 6.0 (GraphPad, La Jolla, CA, USA) were used to compare serum sMICA levels between normal healthy controls and AS patients and between groups of subjects with different genotypes containing at least one *MICA*\*019 allele. The 5% level of significance for p-values was used for all the analyses

**Table S1.** Demographical information of Taiwanese AS patients and normal healthy controls .

| Characteristics            | AS Case<br>N = 895 | Normal<br>N = 896 | Total<br>N = 1791  |
|----------------------------|--------------------|-------------------|--------------------|
| Gender, N (%)              |                    |                   |                    |
| Male                       | 725/895 (81.0%)    | 752/896 (83.9%)   | 1477/1791 (82.46%) |
| Female                     | 170/895 (19.0%)    | 144/896 (16.1%)   | 314/1791 (17.53%)  |
| Age onset, Mean $\pm$ Std. | 25.34 $\pm$ 9.99   |                   |                    |
| Bamboo (Syndesmophyte)     |                    |                   |                    |
| no syndesmophytes          | 529/895 (59.1%)    |                   |                    |
| mSASSS < 24                | 114/895 (12.7%)    |                   |                    |
| mSASSS $\geq$ 24           | 252/895 (28.2%)    |                   |                    |
| B27 final (HLA-B27)        |                    |                   |                    |
| Positive                   | 774/895 (86.5%)    | 41/879 (4.7%)     |                    |
| Negative                   | 121/895 (13.5%)    | 838/879 (95.3%)   |                    |

**Table S2.** *MICA* non-synonymous cSNPs and major alleles identified in Taiwanese normal healthy controls and AS patients.

| Residue<br>Position   | SNP ID<br>Number | Codon<br>Changes        | Exon   | MICA Allele |     |     |     |     |     |     |     |     |     |
|-----------------------|------------------|-------------------------|--------|-------------|-----|-----|-----|-----|-----|-----|-----|-----|-----|
|                       |                  |                         |        | 001 *       | 002 | 008 | 010 | 019 | 045 | 007 | 004 | 033 | 012 |
| 6R > P                | rs9380254        | <u>CGT</u> /CCT         | Exon 2 | G           | -   | -   | C   | -   | -   | -   | -   | -   | -   |
| 14W > G               | rs1063630        | <u>TGG</u> /GGG         | Exon 2 | T           | G   | -   | -   | -   | -   | -   | -   | -   | -   |
| 24A > T               | rs1051785        | <u>GCT</u> / <u>ACT</u> | Exon 2 | A           | G   | G   | G   | G   | G   | G   | G   | G   | -   |
| 36Y > C               | rs1051786        | <u>TAT</u> /TGT         | Exon 2 | G           | -   | A   | A   | A   | -   | -   | A   | A   | -   |
| 122L > V              | rs1051790        | <u>CTG</u> /GTG         | Exon 3 | C           | -   | -   | -   | -   | -   | -   | G   | -   | -   |
| 124T > S              | rs41539919       | <u>ACT</u> / <u>TCT</u> | Exon 3 | A           | -   | -   | -   | -   | -   | -   | -   | T   | -   |
| <b>** 125E &gt; K</b> | <b>rs1051791</b> | <b><u>GAG</u>/AAG</b>   | Exon 3 | A           | G   | G   | G   | G   | G   | G   | G   | G   | G   |
| 129V > M              | rs1051792        | <u>GTG</u> /ATG         | Exon 3 | A           | -   | G   | G   | G   | -   | -   | G   | G   | -   |
| 156H > L              | rs3819268        | <u>CAC</u> /CTC         | Exon 3 | A           | -   | -   | -   | -   | -   | -   | -   | -   | T   |
| 173E > K              | rs1051794        | <u>GAA</u> / <u>AAA</u> | Exon 3 | A           | -   | G   | G   | G   | -   | -   | G   | G   | -   |
| 175G > S              | rs1131896        | <u>GGC</u> /AGC         | Exon 3 | G           | -   | -   | A   | A   | -   | -   | A   | A   | -   |
| 181T > R              | rs1131897        | <u>ACA</u> /AGA         | Exon 3 | C           | -   | -   | -   | -   | -   | -   | G   | -   | -   |
| <b>206S &gt; G</b>    | rs1131898        | <b><u>AGC</u>/GGC</b>   | Exon 4 | G           | -   | A   | A   | A   | A   | -   | A   | A   | -   |
| <b>210R &gt; W</b>    | rs1051798        | <b><u>CGG</u>/TGG</b>   | Exon 4 | T           | -   | C   | C   | C   | C   | -   | C   | C   | -   |
| 213I > T              | rs1140700        | <u>ATA</u> / <u>ACA</u> | Exon 4 | C           | -   | T   | T   | T   | T   | -   | -   | -   | -   |
| <b>215S &gt; T</b>    | rs1051799        | <b><u>ACC</u>/AGC</b>   | Exon 4 | G           | -   | C   | C   | C   | C   | -   | C   | C   | -   |
| 251Q > R              | rs1063635        | <u>CAA</u> /CGA         | Exon 4 | A           | -   | G   | G   | G   | -   | -   | -   | G   | -   |

\* *MICA*\*001 allele was listed as the reference allele for the nucleotide sequence comparison with other *MICA* alleles that had allele frequency >1% in the combined population of Taiwanese normal controls and AS patients as shown in the Table 1. \*\* rs1051791 that causes amino acid (aa) substitution at the residue 125 was not detected in Taiwanese but is listed to compare the nucleotide differences between *MICA*\*001 and major *MICA* alleles identified in Taiwanese. Non-conservative residue changes are underlined. Residue substitutions that define two *MICA* lineages are in bold.

**Table S3.** The LD ( $r^2$ ) between cSNPs and MICA alleles in Taiwanese normal healthy controls and AS patients.

| SNP ID<br>Number | Exon   | MICA Allele |       |       |       |       |       |       |       |       |
|------------------|--------|-------------|-------|-------|-------|-------|-------|-------|-------|-------|
|                  |        | 002         | 008   | 010   | 019   | 045   | 007   | 004   | 033   | 012   |
| rs9380254        | Exon 2 | 0.031       | 0.051 | 0.934 | 0.057 | 0.005 | 0.001 | 0.010 | 0.002 | 0.010 |
| rs1063630        | Exon 2 | 0.952       | 0.061 | 0.030 | 0.068 | 0.006 | 0.003 | 0.012 | 0.001 | 0.012 |
| rs1063631        | Exon 2 | 0.481       | 0.120 | 0.060 | 0.135 | 0.083 | 0.033 | 0.024 | 0.004 | 0.151 |
| rs1051785        | Exon 2 | 0.012       | 0.020 | 0.010 | 0.022 | 0.001 | 0.001 | 0.003 | 0.001 | 0.908 |
| rs17200158       | Exon 2 | 0.000       | 0.001 | 0.000 | 0.001 | 0.000 | 0.000 | 0.000 | 0.000 | 0.000 |
| rs1051786        | Exon 2 | 0.481       | 0.120 | 0.060 | 0.135 | 0.084 | 0.033 | 0.024 | 0.004 | 0.151 |
| rs1063632        | Exon 2 | 0.012       | 0.020 | 0.010 | 0.023 | 0.001 | 0.001 | 0.004 | 0.001 | 0.899 |
| rs41557113       | Exon 3 | 0.000       | 0.001 | 0.001 | 0.001 | 0.000 | 0.001 | 0.000 | 0.000 | 0.000 |
| rs41556715       | Exon 3 | 0.000       | 0.001 | 0.000 | 0.001 | 0.000 | 0.000 | 0.000 | 0.000 | 0.000 |
| rs1051790        | Exon 3 | 0.012       | 0.020 | 0.010 | 0.022 | 0.002 | 0.001 | 0.951 | 0.001 | 0.004 |
| rs41539919       | Exon 3 | 0.001       | 0.004 | 0.002 | 0.004 | 0.000 | 0.001 | 0.001 | 0.976 | 0.001 |
| rs1051792        | Exon 3 | 0.482       | 0.120 | 0.060 | 0.135 | 0.084 | 0.033 | 0.024 | 0.004 | 0.151 |
| rs3819268        | Exon 3 | 0.012       | 0.020 | 0.010 | 0.022 | 0.002 | 0.001 | 0.004 | 0.001 | 0.926 |
| rs1051794        | Exon 3 | 0.468       | 0.123 | 0.062 | 0.139 | 0.081 | 0.032 | 0.025 | 0.003 | 0.147 |
| rs1131896        | Exon 3 | 0.168       | 0.275 | 0.172 | 0.387 | 0.029 | 0.011 | 0.068 | 0.013 | 0.053 |
| rs17206680       | Exon 4 | 0.011       | 0.018 | 0.009 | 0.021 | 0.548 | 0.214 | 0.004 | 0.000 | 0.003 |
| rs1051796        | Exon 4 | 0.480       | 0.120 | 0.060 | 0.136 | 0.083 | 0.033 | 0.024 | 0.004 | 0.150 |
| rs1051797        | Exon 4 | 0.485       | 0.119 | 0.060 | 0.134 | 0.084 | 0.033 | 0.024 | 0.003 | 0.152 |
| rs1140700        | Exon 4 | 0.375       | 0.154 | 0.077 | 0.174 | 0.065 | 0.025 | 0.123 | 0.006 | 0.117 |
| rs1051799        | Exon 4 | 0.491       | 0.118 | 0.059 | 0.133 | 0.085 | 0.033 | 0.023 | 0.003 | 0.154 |
| rs41554616       | Exon 4 | 0.007       | 0.011 | 0.005 | 0.012 | 0.924 | 0.000 | 0.002 | 0.000 | 0.001 |
| rs1063635        | Exon 4 | 0.364       | 0.159 | 0.080 | 0.179 | 0.063 | 0.025 | 0.119 | 0.006 | 0.114 |

**Table S4.** Association of MICA cSNP genotypes and alleles with AS susceptibility in Taiwanese.

| SNP                | Risk Allele<br>Frequency | Genotype Frequency |                 |               | $P_{Trend}^*$ | $P_{FDR}$ | Test for Mode of Inheritance<br>Unadjusted |                        |                        | Test For Mode Of Inheritance<br>Adjusted For Sex |                        |                   |
|--------------------|--------------------------|--------------------|-----------------|---------------|---------------|-----------|--------------------------------------------|------------------------|------------------------|--------------------------------------------------|------------------------|-------------------|
|                    |                          |                    |                 |               |               |           | $p$                                        | $P_{FDR}$              | OR (95%<br>CI)         | $p$                                              | $P_{FDR}$              | OR (95% CI)       |
| rs9380254<br>(G/C) | G                        | GG                 | GC              | CC            |               |           | Additive                                   | $1.47 \times 10^{-6}$  | $2.15 \times 10^{-6}$  | 1.62<br>(1.33–1.97)                              |                        |                   |
| case               | 1586 (88.60%)            | 699<br>(78.10%)    | 188<br>(21.01%) | 8<br>(0.89%)  | <0.0001       | <0.0001   | GG +<br>GC vs.<br>CC                       | 0.0193                 | 0.0305                 | 2.66<br>(1.17–6.04)                              | 0.0341                 | 2.68 (1.18–6.08)  |
| control            | 1488 (83.04%)            | 613<br>(68.42%)    | 262<br>(29.24%) | 21<br>(2.34%) |               |           | GG vs.<br>GC +<br>CC                       | $4.02 \times 10^{-6}$  | $5.90 \times 10^{-6}$  | 1.65<br>(1.33–2.04)                              |                        | 1.65 (1.33–2.03)  |
| rs1063630<br>(T/G) | T                        | TT                 | TG              | GG            |               |           | Additive                                   | $2.36 \times 10^{-17}$ | $4.73 \times 10^{-17}$ | 2.27<br>(1.88–2.75)                              |                        | 2.27 (1.88–2.75)  |
| case               | 1592 (88.94%)            | 702<br>(78.44%)    | 188<br>(21.01%) | 5<br>(0.56%)  | <0.0001       | <0.0001   | TT +<br>TG vs.<br>GG                       | $1.70 \times 10^{-6}$  | $2.94 \times 10^{-6}$  | 9.63<br>(3.81–24.36)                             | $1.68 \times 10^{-6}$  | 9.65 (3.82–24.41) |
| control            | 1400 (78.13%)            | 550<br>(61.38%)    | 300<br>(33.48%) | 46<br>(5.13%) |               |           | TT vs.<br>TG +<br>GG                       | $7.14 \times 10^{-15}$ | $1.43 \times 10^{-14}$ | 2.29<br>(1.86–2.82)                              | $6.73 \times 10^{-15}$ | 2.29 (1.86–2.82)  |
| rs1063631<br>(T/C) | T                        | TT                 | TC              | CC            |               |           | Additive                                   | $1.05 \times 10^{-26}$ | $2.56 \times 10^{-26}$ | 2.39<br>(2.04–2.81)                              |                        | 2.39 (2.04–2.80)  |
| case               | 1434 (80.11%)            | 558<br>(62.35%)    | 318<br>(35.53%) | 19<br>(2.12%) | <0.0001       | <0.0001   | TT +<br>TC vs.<br>CC                       | $1.68 \times 10^{-14}$ | $3.59 \times 10^{-14}$ | 6.92<br>(4.22–11.35)                             | $1.80 \times 10^{-14}$ | 6.91 (4.22–11.33) |

|                  |               |              |              |              |         |         |                |                        |                        |                    |                        |                        |                    |
|------------------|---------------|--------------|--------------|--------------|---------|---------|----------------|------------------------|------------------------|--------------------|------------------------|------------------------|--------------------|
| control          | 1142 (63.73%) | 363 (40.51%) | 416 (46.43%) | 117 (13.06%) |         |         | TT vs. TC + CC | 4.83×10 <sup>-20</sup> | 1.52×10 <sup>-19</sup> | 2.43 (2.01–2.94)   | 5.69×10 <sup>-20</sup> | 1.79×10 <sup>-19</sup> | 2.43 (2.01–2.94)   |
| rs1051785 (G/A)  | G             | GG           | GA           | AA           |         |         | Additive       | 1.91×10 <sup>-9</sup>  | 3.23×10 <sup>-9</sup>  | 2.51 (1.86–3.39)   | 1.99×10 <sup>-9</sup>  | 3.36×10 <sup>-9</sup>  | 2.51 (1.86–3.39)   |
| case             | 1726 (96.42%) | 832 (92.96%) | 62 (6.93%)   | 1 (0.11%)    | <0.0001 | <0.0001 | GG + GA vs. AA | 0.0494                 | 0.0587                 | 8.05 (1.01–64.53)  | 0.0504                 | 0.0693                 | 7.99 (1.00–64.00)  |
| control          | 1638 (91.41%) | 750 (83.71%) | 138 (15.40%) | 8 (0.89%)    |         |         | GG vs. GA + AA | 2.83×10 <sup>-9</sup>  | 4.78×10 <sup>-9</sup>  | 2.57 (1.88–3.51)   | 2.91×10 <sup>-9</sup>  | 4.93×10 <sup>-9</sup>  | 2.57 (1.88–3.51)   |
| rs17200158 (T/G) | T             | TT           | TG           | GG           |         |         | Additive       | 0.4234                 | 0.4234                 | 2.00 (0.37–10.96)  | 0.4581                 | 0.4581                 | 1.90 (0.35–10.45)  |
| case             | 1788 (99.89%) | 893 (99.78%) | 2 (0.22%)    | 0 (0.00%)    | 0.676   | 0.676   | TT + TG vs. GG | NaN                    | NaN                    | 1.00 (1.00–1.00)   | 0.2367                 | 0.2604                 | 1.20 (0.89–1.61)   |
| control          | 1788 (99.78%) | 892 (99.55%) | 4 (0.45%)    | 0 (0.00%)    |         |         | TT vs. TG + GG | 0.4234                 | 0.4436                 | 2.00 (0.37–10.96)  | 0.4581                 | 0.4786                 | 1.90 (0.35–10.45)  |
| rs1051786 (A/G)  | A             | AA           | AG           | GG           |         |         | Additive       | 7.29×10 <sup>-27</sup> | 2.55×10 <sup>-26</sup> | 2.40 (2.04–2.81)   | 8.79×10 <sup>-27</sup> | 2.97×10 <sup>-26</sup> | 2.40 (2.04–2.81)   |
| case             | 1435 (80.17%) | 559 (62.46%) | 317 (35.42%) | 19 (2.12%)   | <0.0001 | <0.0001 | AA + AG vs. GG | 1.68×10 <sup>-14</sup> | 3.59×10 <sup>-14</sup> | 6.92 (4.22–11.35)  | 1.80×10 <sup>-14</sup> | 4.41×10 <sup>-14</sup> | 6.91 (4.22–11.33)  |
| control          | 1142 (63.73%) | 363 (40.51%) | 416 (46.43%) | 117 (13.06%) |         |         | AA vs. AG + GG | 3.14×10 <sup>-20</sup> | 1.15×10 <sup>-19</sup> | 2.44 (2.02–2.95)   | 3.68×10 <sup>-20</sup> | 1.35×10 <sup>-19</sup> | 2.44 (2.02–2.95)   |
| rs1063632 (G/A)  | G             | GG           | GA           | AA           |         |         | Additive       | 4.54×10 <sup>-9</sup>  | 7.14×10 <sup>-9</sup>  | 2.43 (1.81–3.28)   | 4.77×10 <sup>-9</sup>  | 7.50×10 <sup>-9</sup>  | 2.43 (1.81–3.28)   |
| case             | 1724 (96.31%) | 830 (92.74%) | 64 (7.15%)   | 1 (0.11%)    | <0.0001 | <0.0001 | GG + GA vs. AA | 0.0494                 | 0.0587                 | 8.05 (1.01–64.53)  | 0.0504                 | 0.0693                 | 7.99 (1.00–64.00)  |
| control          | 1638 (91.41%) | 750 (83.71%) | 138 (15.40%) | 8 (0.89%)    |         |         | GG vs. GA + AA | 7.23×10 <sup>-9</sup>  | 1.14×10 <sup>-8</sup>  | 2.49 (1.83–3.38)   | 7.52×10 <sup>-9</sup>  | 1.18×10 <sup>-8</sup>  | 2.48 (1.82–3.38)   |
| rs41557113 (G/A) | G             | GG           | GA           | AA           |         |         | Additive       | 0.0166                 | 0.0203                 | 12.14 (1.57–93.53) | 0.0177                 | 0.0216                 | 11.85 (1.54–91.34) |
| case             | 1789 (99.94%) | 894 (99.89%) | 1 (0.11%)    | 0 (0.00%)    | 0.0024  | 0.0029  | GG + GA vs. AA | NaN                    | NaN                    | 1.00 (1.00–1.00)   | 0.2367                 | 0.2604                 | 1.20 (0.89–1.61)   |
| control          | 1780 (99.33%) | 884 (98.66%) | 12 (1.34%)   | 0 (0.00%)    |         |         | GG vs. GA + AA | 0.0166                 | 0.0203                 | 12.14 (1.57–93.53) | 0.0177                 | 0.0216                 | 11.85 (1.54–91.34) |
| rs41556715 (G/A) | G             | GG           | GA           | AA           |         |         | Additive       | 0.2730                 | 0.3003                 | 2.51 (0.48–12.95)  | 0.2869                 | 0.3156                 | 2.44 (0.47–12.62)  |
| case             | 1788 (99.89%) | 893 (99.78%) | 2 (0.22%)    | 0 (0.00%)    | 0.4547  | 0.4890  | GG + GA vs. AA | NaN                    | NaN                    | 1.00 (1.00–1.00)   | 0.2367                 | 0.2604                 | 1.20 (0.89–1.61)   |
| control          | 1787 (99.72%) | 891 (99.44%) | 5 (0.56%)    | 0 (0.00%)    |         |         | GG vs. GA + AA | 0.2730                 | 0.3003                 | 2.51 (0.48–12.95)  | 0.2869                 | 0.3156                 | 2.44 (0.47–12.62)  |
| rs1051790 (C/G)  | C             | CC           | CG           | GG           |         |         | Additive       | 2.05×10 <sup>-5</sup>  | 2.82×10 <sup>-5</sup>  | 1.86 (1.40–2.47)   | 2.54×10 <sup>-5</sup>  | 3.49×10 <sup>-5</sup>  | 1.84 (1.39–2.45)   |
| case             | 1713 (95.70%) | 819 (91.51%) | 75 (8.38%)   | 1 (0.11%)    | <0.0001 | <0.0001 | CC + CG vs. GG | 0.0366                 | 0.0535                 | 9.07 (1.15–71.75)  | 0.0362                 | 0.0613                 | 9.12 (1.15–72.18)  |

|                  |               |              |              |              |         |         |                |                        |                        |                    |                        |                        |                    |
|------------------|---------------|--------------|--------------|--------------|---------|---------|----------------|------------------------|------------------------|--------------------|------------------------|------------------------|--------------------|
| control          | 1652 (92.19%) | 765 (85.38%) | 122 (13.62%) | 9 (1.00%)    |         |         | CC vs. CG + GG | 6.02×10 <sup>-5</sup>  | 7.79×10 <sup>-5</sup>  | 1.85 (1.37–2.49)   | 7.55×10 <sup>-5</sup>  | 9.77×10 <sup>-5</sup>  | 1.83 (1.36–2.47)   |
| rs41539919 (A/T) | T             | AA           | AT           | TT           |         |         | Additive       | 3.79×10 <sup>-5</sup>  | 4.91×10 <sup>-5</sup>  | 19.90 (4.80–82.56) | 3.93×10 <sup>-5</sup>  | 5.08×10 <sup>-5</sup>  | 19.79 (4.77–82.09) |
| case             | 40 (2.23%)    | 856 (95.64%) | 38 (4.25%)   | 1 (0.11%)    | <0.0001 | <0.0001 | TT + AT vs. AA | 3.35×10 <sup>-5</sup>  | 4.61×10 <sup>-5</sup>  | 20.37 (4.90–84.60) | 3.46×10 <sup>-5</sup>  | 4.76×10 <sup>-5</sup>  | 20.26 (4.88–84.19) |
| control          | 2 (0.11%)     | 894 (99.78%) | 2 (0.22%)    | 0 (0.00%)    |         |         | TT vs. AT + AA | 1.0000                 | 1.0000                 | Inf (0.00–Inf)     | 1.0000                 | 1.0000                 | Inf (0.00–Inf)     |
| rs1051792 (G/A)  | G             | GG           | GA           | AA           |         |         | Additive       | 2.39×10 <sup>-27</sup> | 1.05×10 <sup>-26</sup> | 2.42 (2.06–2.84)   | 2.88×10 <sup>-27</sup> | 1.27×10 <sup>-26</sup> | 2.42 (2.06–2.84)   |
| case             | 1437 (80.28%) | 561 (62.68%) | 315 (35.20%) | 19 (2.12%)   | <0.0001 | <0.0001 | GG + GA vs. AA | 1.68×10 <sup>-14</sup> | 3.59×10 <sup>-14</sup> | 6.92 (4.22–11.35)  | 1.80×10 <sup>-14</sup> | 4.41×10 <sup>-14</sup> | 6.91 (4.22–11.33)  |
| control          | 1141 (63.67%) | 362 (40.40%) | 417 (46.54%) | 117 (13.06%) |         |         | GG vs. GA + AA | 8.55×10 <sup>-21</sup> | 3.76×10 <sup>-20</sup> | 2.48 (2.05–3.00)   | 1.00×10 <sup>-20</sup> | 4.40×10 <sup>-20</sup> | 2.47 (2.05–2.99)   |
| rs3819268 (A/T)  | A             | AA           | AT           | TT           |         |         | Additive       | 7.04×10 <sup>-10</sup> | 1.29×10 <sup>-9</sup>  | 2.62 (1.93–3.55)   | 8.04×10 <sup>-10</sup> | 1.47×10 <sup>-9</sup>  | 2.61 (1.92–3.54)   |
| case             | 1729 (96.59%) | 835 (93.30%) | 59 (6.59%)   | 1 (0.11%)    | <0.0001 | <0.0001 | AA + AT vs. TT | 0.0494                 | 0.0587                 | 8.05 (1.01–64.53)  | 0.0504                 | 0.0693                 | 7.99 (1.00–64.00)  |
| control          | 1639 (91.46%) | 751 (83.82%) | 137 (15.29%) | 8 (0.89%)    |         |         | AA vs. AT + TT | 9.41×10 <sup>-10</sup> | 1.73×10 <sup>-9</sup>  | 2.69 (1.96–3.69)   | 1.07×10 <sup>-9</sup>  | 1.97×10 <sup>-9</sup>  | 2.68 (1.95–3.68)   |
| rs1051794 (G/A)  | G             | GG           | GA           | AA           |         |         | Additive       | 1.91×10 <sup>-28</sup> | 1.05×10 <sup>-27</sup> | 2.46 (2.10–2.88)   | 2.39×10 <sup>-28</sup> | 1.32×10 <sup>-27</sup> | 2.45 (2.09–2.88)   |
| case             | 1431 (79.94%) | 557 (62.23%) | 317 (35.42%) | 21 (2.35%)   | <0.0001 | <0.0001 | GG + GA vs. AA | 6.52×10 <sup>-15</sup> | 2.48×10 <sup>-14</sup> | 6.56 (4.09–10.53)  | 7.28×10 <sup>-15</sup> | 3.20×10 <sup>-14</sup> | 6.54 (4.07–10.50)  |
| control          | 1126 (62.83%) | 352 (39.29%) | 422 (47.10%) | 122 (13.62%) |         |         | GG vs. GA + AA | 6.26×10 <sup>-22</sup> | 3.44×10 <sup>-21</sup> | 2.55 (2.11–3.08)   | 7.43×10 <sup>-22</sup> | 4.09×10 <sup>-21</sup> | 2.54 (2.10–3.08)   |
| rs1131896 (G/A)  | A             | GG           | GA           | AA           |         |         | Additive       | 1.96×10 <sup>-56</sup> | 4.31×10 <sup>-55</sup> | 3.90 (3.30–4.62)   | 1.23×10 <sup>-56</sup> | 2.71×10 <sup>-55</sup> | 3.92 (3.31–4.64)   |
| case             | 1092 (61.01%) | 73 (8.16%)   | 552 (61.68%) | 270 (30.17%) | <0.0001 | <0.0001 | AA + GA vs. GG | 4.82×10 <sup>-55</sup> | 1.06×10 <sup>-53</sup> | 8.84 (6.72–11.62)  | 3.00×10 <sup>-55</sup> | 6.59×10 <sup>-54</sup> | 8.92 (6.78–11.73)  |
| control          | 601 (33.54%)  | 394 (43.97%) | 403 (44.98%) | 99 (11.05%)  |         |         | AA vs. GA + GG | 4.60×10 <sup>-22</sup> | 8.75×10 <sup>-21</sup> | 3.48 (2.70–4.48)   | 3.87×10 <sup>-22</sup> | 8.50×10 <sup>-21</sup> | 3.49 (2.71–4.49)   |
| rs17206680 (C/T) | C             | CC           | CT           | TT           |         |         | Additive       | 0.422963               | 0.423435               | 1.13 (0.84–1.50)   | 0.445551               | 0.458134               | 1.12 (0.84–1.49)   |
| case             | 1695 (94.69%) | 801 (89.50%) | 93 (10.39%)  | 1 (0.11%)    | 0.4668  | 0.4890  | CC + CT vs. TT | 0.571713               | 0.603475               | 2.00 (0.18–22.10)  | 0.586441               | 0.614367               | 1.95 (0.18–21.53)  |
| control          | 1686 (94.08%) | 792 (88.39%) | 102 (11.38%) | 2 (0.22%)    |         |         | CC vs. CT + TT | 0.456311               | 0.456311               | 1.12 (0.83–1.50)   | 0.478649               | 0.478649               | 1.11 (0.83–1.50)   |
| rs1051796 (C/T)  | C             | CC           | CT           | TT           |         |         | Additive       | 8.68×10 <sup>-26</sup> | 1.91×10 <sup>-25</sup> | 2.35 (2.01–2.76)   | 1.03×10 <sup>-25</sup> | 2.27×10 <sup>-25</sup> | 2.35 (2.00–2.76)   |
| case             | 1430 (79.89%) | 553 (61.79%) | 324 (36.20%) | 18 (2.01%)   | <0.0001 | <0.0001 | CC + CT vs. TT | 2.32×10 <sup>-14</sup> | 4.41×10 <sup>-14</sup> | 7.17 (4.32–11.90)  | 2.44×10 <sup>-14</sup> | 5.38×10 <sup>-14</sup> | 7.16 (4.32–11.89)  |

|                  |               |              |              |              |         |         |                |                        |                        |                   |                        |                        |                   |
|------------------|---------------|--------------|--------------|--------------|---------|---------|----------------|------------------------|------------------------|-------------------|------------------------|------------------------|-------------------|
| control          | 1145 (63.90%) | 364 (40.63%) | 417 (46.54%) | 115 (12.83%) |         |         | CC vs. CT + TT | 6.12×10 <sup>-19</sup> | 1.35×10 <sup>-18</sup> | 2.36 (1.96–2.86)  | 7.13×10 <sup>-19</sup> | 1.57×10 <sup>-18</sup> | 2.36 (1.95–2.85)  |
| rs1051797 (C/T)  | C             | CC           | CT           | TT           |         |         | Additive       | 8.68×10 <sup>-27</sup> | 2.55×10 <sup>-26</sup> | 2.41 (2.05–2.82)  | 1.02×10 <sup>-26</sup> | 2.97×10 <sup>-26</sup> | 2.40 (2.05–2.82)  |
| case             | 1437 (80.28%) | 559 (62.46%) | 319 (35.64%) | 17 (1.90%)   | <0.0001 | <0.0001 | CC + CT vs. TT | 1.70×10 <sup>-14</sup> | 3.59×10 <sup>-14</sup> | 7.60 (4.53–12.77) | 1.78×10 <sup>-14</sup> | 4.41×10 <sup>-14</sup> | 7.60 (4.52–12.76) |
| control          | 1146 (63.95%) | 365 (40.74%) | 416 (46.43%) | 115 (12.83%) |         |         | CC vs. CT + TT | 7.34×10 <sup>-20</sup> | 1.79×10 <sup>-19</sup> | 2.42 (2.00–2.93)  | 8.52×10 <sup>-20</sup> | 2.08×10 <sup>-19</sup> | 2.42 (2.00–2.92)  |
| rs1140700 (T/C)  | T             | TT           | TC           | CC           |         |         | Additive       | 1.06×10 <sup>-32</sup> | 7.80×10 <sup>-32</sup> | 2.53 (2.17–2.95)  | 1.52×10 <sup>-32</sup> | 1.12×10 <sup>-31</sup> | 2.53 (2.17–2.95)  |
| case             | 1367 (76.37%) | 502 (56.09%) | 363 (40.56%) | 30 (3.35%)   | <0.0001 | <0.0001 | TT + TC vs. CC | 4.31×10 <sup>-21</sup> | 4.10×10 <sup>-20</sup> | 6.85 (4.59–10.22) | 5.00×10 <sup>-21</sup> | 5.50×10 <sup>-20</sup> | 6.83 (4.58–10.19) |
| control          | 1020 (56.92%) | 296 (33.04%) | 428 (47.77%) | 172 (19.20%) |         |         | TT vs. TC + CC | 2.50×10 <sup>-22</sup> | 1.83×10 <sup>-21</sup> | 2.59 (2.14–3.14)  | 3.44×10 <sup>-22</sup> | 2.52×10 <sup>-21</sup> | 2.58 (2.13–3.13)  |
| rs1051799 (C/G)  | C             | CC           | CG           | GG           |         |         | Additive       | 9.28×10 <sup>-27</sup> | 2.55×10 <sup>-26</sup> | 2.37 (2.02–2.77)  | 1.08×10 <sup>-26</sup> | 2.97×10 <sup>-26</sup> | 2.36 (2.02–2.77)  |
| case             | 1444 (80.67%) | 570 (63.69%) | 304 (33.97%) | 21 (2.35%)   | <0.0001 | <0.0001 | CC + CG vs. GG | 2.31×10 <sup>-15</sup> | 1.10×10 <sup>-14</sup> | 6.75 (4.21–10.82) | 2.37×10 <sup>-15</sup> | 1.30×10 <sup>-14</sup> | 6.75 (4.21–10.82) |
| control          | 1147 (64.01%) | 376 (41.96%) | 395 (44.08%) | 125 (13.95%) |         |         | CC vs. CG + GG | 6.72×10 <sup>-20</sup> | 1.79×10 <sup>-19</sup> | 2.43 (2.01–2.93)  | 7.84×10 <sup>-20</sup> | 2.08×10 <sup>-19</sup> | 2.42 (2.00–2.93)  |
| rs41554616 (C/G) | C             | CC           | CG           | GG           |         |         | Additive       | 0.1534                 | 0.1776                 | 1.30 (0.91–1.85)  | 0.1675                 | 0.1940                 | 1.29 (0.90–1.84)  |
| case             | 1737 (97.04%) | 843 (94.19%) | 51 (5.70%)   | 1 (0.11%)    | 0.1763  | 0.2041  | CC + CG vs. GG | 0.2147                 | 0.2399                 | 4.01 (0.45–35.94) | 0.2234                 | 0.2604                 | 3.91 (0.44–35.04) |
| control          | 1723 (96.15%) | 831 (92.75%) | 61 (6.81%)   | 4 (0.45%)    |         |         | CC vs. CG + GG | 0.2170                 | 0.2513                 | 1.27 (0.87–1.85)  | 0.2342                 | 0.2711                 | 1.26 (0.86–1.83)  |
| rs1063635 (G/A)  | G             | GG           | GA           | AA           |         |         | Additive       | 2.44×10 <sup>-33</sup> | 2.69×10 <sup>-32</sup> | 2.57 (2.21–3.00)  | 3.58×10 <sup>-33</sup> | 3.94×10 <sup>-32</sup> | 2.57 (2.20–3.00)  |
| case             | 1356 (75.75%) | 492 (54.97%) | 372 (41.56%) | 31 (3.46%)   | <0.0001 | <0.0001 | GG + GA vs. AA | 9.58×10 <sup>-21</sup> | 6.06×10 <sup>-20</sup> | 6.57 (4.43–9.76)  | 1.11×10 <sup>-20</sup> | 8.16×10 <sup>-20</sup> | 6.56 (4.42–9.73)  |
| control          | 1007 (56.19%) | 282 (31.47%) | 443 (49.44%) | 171 (19.08%) |         |         | GG vs. GA + AA | 3.02×10 <sup>-23</sup> | 3.32×10 <sup>-22</sup> | 2.66 (2.19–3.22)  | 4.30×10 <sup>-23</sup> | 4.73×10 <sup>-22</sup> | 2.65 (2.19–3.21)  |

\*  $P_{Trend}$  indicates the  $p$ -value from the Cochran–Armitage trend test with 10,000 permutations. Specifically, the cSNP rs1051792A>G was significantly associated with AS susceptibility in genotype test (AG + GG vs. AA:  $P_{adj} = 1.80 \times 10^{-14}$ ;  $P_{FDR} = 4.41 \times 10^{-14}$ , OR 6.91, 95% CI 4.22–11.33. GG vs. AA + AG:  $P_{adj} = 1.0 \times 10^{-20}$ ,  $P_{FDR} = 4.4 \times 10^{-20}$ , OR 2.47, 95% CI 2.05–2.99. Additive model:  $P_i = 2.88 \times 10^{-27}$ ,  $P_{FDR} = 1.27 \times 10^{-26}$ , OR 2.42, 95% CI 2.06–2.84) and in allele test (trend test  $p < 0.0001$ ). *MICA* cSNP rs1063630T>G, rs1063631T>G, rs1051786A>G, rs1051794G>A, rs1131896G>A, rs1051796C>T, rs1051797C>T, rs1140700T>C, rs1051799C>T, rs1063635G>A were also significantly associated with AS susceptibility.

**Table S5.** Association of *MICA* cSNP genotypes and alleles with HLA-B27 positivity in AS patients.

| SNP              | Risk Allele Frequency | Genotype Frequency |              |             | $P_{Trend}^{d*}$ | $P_{FDR}$ | Test for mode of inheritance unadjusted |                        |                        | Test for mode of inheritance adjusted for sex |                        |                        |                    |
|------------------|-----------------------|--------------------|--------------|-------------|------------------|-----------|-----------------------------------------|------------------------|------------------------|-----------------------------------------------|------------------------|------------------------|--------------------|
|                  |                       |                    |              |             |                  |           | P                                       | $P_{FDR}$              | OR (95% CI)            | P                                             | $P_{FDR}$              | OR (95% CI)            |                    |
| rs9380254 (G/C)  | G                     | GG                 | GC           | CC          |                  |           | Additive                                | 1.09×10 <sup>-5</sup>  | 1.60×10 <sup>-5</sup>  | 2.38 (1.62–3.50)                              | 1.39×10 <sup>-5</sup>  | 2.35×10 <sup>-5</sup>  | 2.37 (1.61–3.49)   |
| B27 positive     | 1409 (89.86%)         | 628 (80.10%)       | 153 (19.52%) | 3 (0.38%)   | <0.001           | <0.001    | GG + GC vs. CC                          | 0.0007                 | 0.0009                 | 12.28 (2.89–52.13)                            | 0.0008                 | 0.0008                 | 12.27 (2.85–52.84) |
| B27 negative     | 177 (79.73%)          | 71 (63.96%)        | 35 (31.53%)  | 5 (4.50%)   |                  |           | GG vs. GC + CC                          | 0.0002                 | 0.0002                 | 2.27 (1.48–3.47)                              | 0.0002                 | 0.0003                 | 2.26 (1.47–3.47)   |
| rs1063630 (T/G)  | T                     | TT                 | TG           | GG          |                  |           | Additive                                | 6.06×10 <sup>-11</sup> | 9.52×10 <sup>-11</sup> | 3.72 (2.51–5.51)                              | 7.16×10 <sup>-11</sup> | 1.31×10 <sup>-10</sup> | 3.74 (2.52–5.56)   |
| B27 positive     | 1424 (90.82%)         | 642 (81.89%)       | 140 (17.86%) | 2 (0.26%)   | <0.001           | <0.001    | TT + TG vs. GG                          | 0.0094                 | 0.0112                 | 10.86 (1.79–65.74)                            | 0.0091                 | 0.0091                 | 11.21 (1.82–68.96) |
| B27 negative     | 168 (75.68%)          | 60 (54.05%)        | 48 (43.24%)  | 3 (2.70%)   |                  |           | TT vs. TG + GG                          | 2.08×10 <sup>-10</sup> | 9.16×10 <sup>-10</sup> | 3.84 (2.54–5.82)                              | 2.54×10 <sup>-10</sup> | 1.86×10 <sup>-9</sup>  | 3.86 (2.54–5.87)   |
| rs1063631 (T/C)  | T                     | TT                 | TC           | CC          |                  |           | Additive                                | 1.20×10 <sup>-12</sup> | 2.93×10 <sup>-12</sup> | 3.72 (2.59–5.34)                              | 8.26×10 <sup>-13</sup> | 2.60×10 <sup>-12</sup> | 3.81 (2.64–5.50)   |
| B27 positive     | 1296 (82.65%)         | 518 (66.07%)       | 260 (33.16%) | 6 (0.77%)   | <0.001           | <0.001    | TT + TC vs. CC                          | 1.77×10 <sup>-8</sup>  | 3.74×10 <sup>-8</sup>  | 17.20 (6.39–46.29)                            | 1.86×10 <sup>-8</sup>  | 2.73×10 <sup>-8</sup>  | 17.92 (6.56–48.99) |
| B27 negative     | 138 (62.16%)          | 40 (36.04%)        | 58 (52.25%)  | 13 (11.71%) |                  |           | TT vs. TC + CC                          | 4.59×10 <sup>-9</sup>  | 9.18×10 <sup>-9</sup>  | 3.46 (2.28–5.23)                              | 2.75×10 <sup>-9</sup>  | 6.71×10 <sup>-9</sup>  | 3.56 (2.34–5.41)   |
| rs1051785 (G/A)  | G                     | GG                 | GA           | AA          |                  |           | Additive                                | 0.2390                 | 0.2767                 | 1.49 (0.77–2.91)                              | 0.2065                 | 0.2673                 | 1.54 (0.79–3.03)   |
| B27 positive     | 1515 (96.62%)         | 731 (93.24%)       | 53 (6.76%)   | 0 (0.00%)   | 0.2484           | 0.3215    | GG + GA vs. AA                          | 1.0000                 | 1.0000                 | Inf (0.00– Inf)                               | 0                      | 0                      | Inf ( Inf– Inf)    |
| B27 negative     | 211 (95.05%)          | 101 (90.99%)       | 9 (8.11%)    | 1 (0.90%)   |                  |           | GG vs. GA + AA                          | 0.3877                 | 0.4490                 | 1.37 (0.67–2.77)                              | 0.3482                 | 0.4506                 | 1.41 (0.69–2.86)   |
| rs17200158 (T/G) | T                     | TT                 | TG           | GG          |                  |           | Additive                                | 0                      | 0                      | 0.00 (0.00–0.00)                              | 1.0000                 | 1.0000                 | 0.00 (0.00– Inf)   |
| B27 positive     | 1566 (99.87%)         | 782 (99.74%)       | 2 (0.26%)    | 0 (0.00%)   | 1                | 1         | TT + TG vs. GG                          | NaN                    | NaN                    | 1.00 (1.00–1.00)                              | 2.93×10 <sup>-20</sup> | 6.45×10 <sup>-20</sup> | 0.06 (0.03–0.11)   |
| B27 negative     | 222 (100.00%)         | 111 (100.00%)      | 0 (0.00%)    | 0 (0.00%)   |                  |           | TT vs. TG + GG                          | 0                      | 0                      | 0.00 (0.00–0.00)                              | 1.0000                 | 1.0000                 | 0.00 (0.00– Inf)   |
| rs1051786 (A/G)  | A                     | AA                 | AG           | GG          |                  |           | Additive                                | 1.03×10 <sup>-12</sup> | 2.82×10 <sup>-12</sup> | 3.73 (2.60–5.36)                              | 7.21×10 <sup>-13</sup> | 2.60×10 <sup>-12</sup> | 3.83 (2.65–5.52)   |
| B27 positive     | 1297 (82.72%)         | 519 (66.20%)       | 259 (33.04%) | 6 (0.77%)   | <0.001           | <0.001    | AA + AG vs. GG                          | 1.77×10 <sup>-8</sup>  | 3.74×10 <sup>-8</sup>  | 17.20 (6.39–46.29)                            | 1.86×10 <sup>-8</sup>  | 2.73×10 <sup>-8</sup>  | 17.92 (6.56–48.99) |
| B27 negative     | 138 (62.16%)          | 40 (36.04%)        | 58 (52.25%)  | 13 (11.71%) |                  |           | AA vs. AG + GG                          | 3.92×10 <sup>-9</sup>  | 8.62×10 <sup>-9</sup>  | 3.48 (2.30–5.26)                              | 2.39×10 <sup>-9</sup>  | 6.71×10 <sup>-9</sup>  | 3.58 (2.35–5.44)   |
| rs1063632 (G/A)  | G                     | GG                 | GA           | AA          |                  |           | Additive                                | 0.2852                 | 0.3137                 | 1.44 (0.74–2.80)                              | 0.2436                 | 0.2977                 | 1.49 (0.76–2.92)   |
| B27 positive     | 1513 (96.49%)         | 729 (92.98%)       | 55 (7.02%)   | 0 (0.00%)   | 0.3447           | 0.4213    | GG + GA vs. AA                          | 1.0000                 | 1.0000                 | Inf (0.00–Inf)                                | 0                      | 0                      | Inf ( Inf– Inf)    |
| B27 negative     | 211 (95.05%)          | 101 (90.99%)       | 9 (8.11%)    | 1 (0.90%)   |                  |           | GG vs. GA + AA                          | 0.4500                 | 0.4950                 | 1.31 (0.65–2.66)                              | 0.3999                 | 0.4888                 | 1.36 (0.67–2.76)   |
| rs41557113 (G/A) | G                     | GG                 | GA           | AA          |                  |           | Additive                                | 0                      | 0                      | 0.00 (0.00–0.00)                              | 0.9998                 | 1.0000                 | 0.00 (0.00– Inf)   |
| B27 positive     | 1567 (99.94%)         | 783 (99.87%)       | 1 (0.13%)    | 0 (0.00%)   | 1                | 1         | GG + GA vs. AA                          | NaN                    | NaN                    | 1.00 (1.00–1.00)                              | 2.93×10 <sup>-20</sup> | 6.45×10 <sup>-20</sup> | 0.06 (0.03–0.11)   |



|                      |               |                  |                 |                 |             |             |                   |                        |                        |                     |                        |                        |                    |
|----------------------|---------------|------------------|-----------------|-----------------|-------------|-------------|-------------------|------------------------|------------------------|---------------------|------------------------|------------------------|--------------------|
| B27<br>negative      | 222 (100.00%) | 111<br>(100.00%) | 0 (0.00%)       | 0 (0.00%)       |             |             | GG vs. GA<br>+ AA | 0                      | 0                      | 0.00 (0.00–0.00)    | 0.9998                 | 1.0000                 | 0.00 (0.00– Inf)   |
| rs4155671<br>5 (G/A) | G             | GG               | GA              | AA              |             |             | Additive          | 4.09×10 <sup>-92</sup> | 3.00×10 <sup>-91</sup> | 0.00 (0.00–0.00)    | 0                      | 0                      | 0.00 (0.00–0.00)   |
| B27<br>positive      | 1566 (99.87%) | 782<br>(99.74%)  | 2 (0.26%)       | 0 (0.00%)       | 1           | 1           | GG + GA<br>vs. AA | NaN                    | NaN                    | 1.00 (1.00–1.00)    | 2.93×10 <sup>-20</sup> | 6.45×10 <sup>-20</sup> | 0.06 (0.03–0.11)   |
| B27<br>negative      | 222 (100.00%) | 111<br>(100.00%) | 0 (0.00%)       | 0 (0.00%)       |             |             | GG vs. GA<br>+ AA | 4.09×10 <sup>-92</sup> | 3.00×10 <sup>-91</sup> | 0.00 (0.00–0.00)    | 0                      | 0                      | 0.00 (0.00–0.00)   |
| rs1051790<br>(C/G)   | C             | CC               | CG              | GG              |             |             | Additive          | 0.0239                 | 0.0292                 | 1.95 (1.09–3.48)    | 0.0187                 | 0.0257                 | 2.02 (1.12–3.62)   |
| B27<br>positive      | 1507 (96.11%) | 723<br>(92.22%)  | 61 (7.78%)      | 0 (0.00%)       | 0.03<br>1   | 0.042<br>6  | CC + CG<br>vs. GG | 0                      | 0                      | Inf (Inf– Inf)      | 0                      | 0                      | Inf (Inf– Inf)     |
| B27<br>negative      | 206 (92.79%)  | 96<br>(86.49%)   | 14<br>(12.61%)  | 1 (0.90%)       |             |             | CC vs. CG<br>+ GG | 0.0454                 | 0.0555                 | 1.85 (1.01–3.39)    | 0.0374                 | 0.0514                 | 1.91 (1.04–3.51)   |
| rs4153991<br>9 (A/T) | T             | AA               | AT              | TT              |             |             | Additive          | 1.0000                 | 1.0000                 | Inf (0.00– Inf)     | 1.0000                 | 1.0000                 | Inf (0.00– Inf)    |
| B27<br>positive      | 40 (2.55%)    | 745<br>(95.03%)  | 38 (4.85%)      | 1 (0.13%)       | 0.02<br>67  | 0.039<br>2  | TT + AT vs.<br>AA | 1.0000                 | 1.0000                 | Inf (0.00– Inf)     | 1.0000                 | 1.0000                 | Inf (0.00– Inf)    |
| B27<br>negative      | 0 (0.00%)     | 111<br>(100.00%) | 0 (0.00%)       | 0 (0.00%)       |             |             | TT vs. AT +<br>AA | 0                      | 0                      | Inf (Inf– Inf)      | 0                      | 0                      | Inf (Inf– Inf)     |
| rs1051792<br>(G/A)   | G             | GG               | GA              | AA              |             |             | Additive          | 7.52×10 <sup>-13</sup> | 2.36×10 <sup>-12</sup> | 3.76 (2.62–5.40)    | 5.49×10 <sup>-13</sup> | 2.41×10 <sup>-12</sup> | 3.85 (2.67–5.55)   |
| B27<br>positive      | 1299 (82.84%) | 521<br>(66.45%)  | 257<br>(32.78%) | 6 (0.77%)       | <0.0<br>001 | <0.00<br>01 | GG + GA<br>vs. AA | 1.77×10 <sup>-8</sup>  | 3.74×10 <sup>-8</sup>  | 17.20 (6.39–46.29)  | 1.86×10 <sup>-8</sup>  | 2.73×10 <sup>-8</sup>  | 17.92 (6.56–48.99) |
| B27<br>negative      | 138 (62.16%)  | 40<br>(36.04%)   | 58<br>(52.25%)  | 13<br>(11.71%)  |             |             | GG vs. GA<br>+ AA | 2.85×10 <sup>-9</sup>  | 8.62×10 <sup>-9</sup>  | 3.52 (2.32–5.32)    | 1.80×10 <sup>-9</sup>  | 6.71×10 <sup>-9</sup>  | 3.61 (2.38–5.49)   |
| rs3819268<br>(A/T)   | A             | AA               | AT              | TT              |             |             | Additive          | 0.3379                 | 0.3540                 | 1.40 (0.70–2.81)    | 0.2713                 | 0.3141                 | 1.48 (0.74–2.98)   |
| B27<br>positive      | 1517 (96.75%) | 733<br>(93.49%)  | 51 (6.51%)      | 0 (0.00%)       | 0.42<br>78  | 0.495<br>3  | AA + AT<br>vs. TT | 1.0000                 | 1.0000                 | Inf (0.00– Inf)     | 0                      | 0                      | Inf ( Inf– Inf)    |
| B27<br>negative      | 212 (95.50%)  | 102<br>(91.89%)  | 8 (7.21%)       | 1 (0.90%)       |             |             | AA vs. AT<br>+ TT | 0.5282                 | 0.5534                 | 1.27 (0.61–2.65)    | 0.4467                 | 0.5172                 | 1.33 (0.63–2.81)   |
| rs1051794<br>(G/A)   | G             | GG               | GA              | AA              |             |             | Additive          | 2.61×10 <sup>-12</sup> | 5.74×10 <sup>-12</sup> | 3.56 (2.50–5.09)    | 1.63×10 <sup>-12</sup> | 4.49×10 <sup>-12</sup> | 3.66 (2.56–5.26)   |
| B27<br>positive      | 1293 (82.46%) | 517<br>(65.94%)  | 259<br>(33.04%) | 8 (1.02%)       | <0.0<br>001 | <0.00<br>01 | GG + GA<br>vs. AA | 3.20×10 <sup>-8</sup>  | 6.08×10 <sup>-8</sup>  | 12.87 (5.20–31.82)  | 3.00×10 <sup>-8</sup>  | 4.13×10 <sup>-8</sup>  | 13.49 (5.37–33.85) |
| B27<br>negative      | 138 (62.16%)  | 40<br>(36.04%)   | 58<br>(52.25%)  | 13<br>(11.71%)  |             |             | GG vs. GA<br>+ AA | 5.37×10 <sup>-9</sup>  | 9.85×10 <sup>-9</sup>  | 3.44 (2.27–5.20)    | 3.16×10 <sup>-9</sup>  | 6.94×10 <sup>-9</sup>  | 3.54 (2.33–5.38)   |
| rs1131896<br>(G/A)   | A             | GG               | GA              | AA              |             |             | Additive          | 5.45×10 <sup>-20</sup> | 3.00×10 <sup>-19</sup> | 7.30 (4.77–11.16)   | 1.96×10 <sup>-19</sup> | 2.16×10 <sup>-19</sup> | 7.09 (4.63–10.86)  |
| B27<br>positive      | 1013 (64.60%) | 29<br>(3.70%)    | 497<br>(63.39%) | 258<br>(32.91%) | <0.0<br>001 | <0.00<br>01 | AA + GA<br>vs. GG | 1.13×10 <sup>-25</sup> | 6.23×10 <sup>-25</sup> | 17.10 (10.05–29.08) | 9.02×10 <sup>-25</sup> | 9.92×10 <sup>-25</sup> | 16.55 (9.69–28.26) |
| B27<br>negative      | 79 (35.59%)   | 44<br>(39.64%)   | 55<br>(49.55%)  | 12<br>(10.81%)  |             |             | AA vs. GA<br>+ GG | 9.08×10 <sup>-6</sup>  | 1.23×10 <sup>-5</sup>  | 4.05 (2.18–7.50)    | 7.64×10 <sup>-6</sup>  | 8.40×10 <sup>-6</sup>  | 4.12 (2.21–7.65)   |
| rs1720668<br>0 (C/T) | C             | CC               | CT              | TT              |             |             | Additive          | 0.0207                 | 0.0268                 | 1.89 (1.10–3.24)    | 0.0157                 | 0.0230                 | 1.96 (1.14–3.37)   |
| B27<br>positive      | 1492 (95.15%) | 709<br>(90.43%)  | 74 (9.44%)      | 1 (0.13%)       | 0.02<br>62  | 0.039<br>2  | CC + CT vs.<br>TT | 0                      | 0                      | 0.00 (0.00–0.00)    | 0                      | 0                      | 0.00 (0.00–0.00)   |

|                      |               |                 |                 |                |        |                   |                        |                        |                        |                                     |                                     |                                     |                    |
|----------------------|---------------|-----------------|-----------------|----------------|--------|-------------------|------------------------|------------------------|------------------------|-------------------------------------|-------------------------------------|-------------------------------------|--------------------|
| B27<br>negative      | 203 (91.44%)  | 92<br>(82.88%)  | 19<br>(17.12%)  | 0 (0.00%)      |        | CC vs. CT +<br>TT | 0.0168                 | 0.0217                 | 1.95 (1.13–3.38)       | 0.0129                              | 0.0189                              | 2.02 (1.16–3.51)                    |                    |
| rs1051796<br>(C/T)   | C             | CC              | CT              | TT             |        | Additive          | 1.66×10 <sup>-11</sup> | 2.80×10 <sup>-11</sup> | 3.47 (2.42–4.99)       | 1.11×10 <sup>-11</sup> <sub>1</sub> | 2.21×10 <sup>-11</sup> <sub>1</sub> | 3.56 (2.47–5.14)                    |                    |
| B27<br>positive      | 1290 (82.27%) | 513<br>(65.43%) | 264<br>(33.67%) | 7 (0.89%)      | <0.001 | <0.001            | CC + CT vs.<br>TT      | 4.31×10 <sup>-07</sup> | 6.82×10 <sup>-07</sup> | 12.21 (4.63–32.22)                  | 5.29×10 <sup>-07</sup>              | 6.47×10 <sup>-07</sup>              | 12.47 (4.65–33.44) |
| B27<br>negative      | 140 (63.06%)  | 40<br>(36.04%)  | 60<br>(54.05%)  | 11 (9.91%)     |        | CC vs. CT +<br>TT | 9.99×10 <sup>-9</sup>  | 1.69×10 <sup>-8</sup>  | 3.36 (2.22–5.09)       | 5.47×10 <sup>-9</sup>               | 1.09×10 <sup>-8</sup>               | 3.47 (2.29–5.28)                    |                    |
| rs1051797<br>(C/T)   | C             | CC              | CT              | TT             |        | Additive          | 4.90×10 <sup>-12</sup> | 9.79×10 <sup>-12</sup> | 3.62 (2.52–5.22)       | 3.80×10 <sup>-12</sup> <sub>2</sub> | 9.29×10 <sup>-12</sup> <sub>2</sub> | 3.70 (2.56–5.36)                    |                    |
| B27<br>positive      | 1297 (82.72%) | 519<br>(66.20%) | 259<br>(33.04%) | 6 (0.77%)      | <0.001 | <0.001            | CC + CT vs.<br>TT      | 2.97×10 <sup>-07</sup> | 5.12×10 <sup>-07</sup> | 14.26 (5.16–39.41)                  | 3.87×10 <sup>-07</sup> <sub>7</sub> | 5.01×10 <sup>-07</sup> <sub>7</sub> | 14.51 (5.16–40.76) |
| B27<br>negative      | 140 (63.06%)  | 40<br>(36.04%)  | 60<br>(54.05%)  | 11 (9.91%)     |        | CC vs. CT +<br>TT | 3.92×10 <sup>-9</sup>  | 8.62×10 <sup>-9</sup>  | 3.48 (2.30–5.26)       | 2.39×10 <sup>-9</sup>               | 6.71×10 <sup>-9</sup>               | 3.58 (2.35–5.44)                    |                    |
| rs1140700<br>(T/C)   | T             | TT              | TC              | CC             |        | Additive          | 3.09×10 <sup>-14</sup> | 1.13×10 <sup>-13</sup> | 4.03 (2.81–5.77)       | 2.20×10 <sup>-14</sup> <sub>4</sub> | 1.21×10 <sup>-14</sup> <sub>3</sub> | 4.13 (2.87–5.94)                    |                    |
| B27<br>positive      | 1243 (79.27%) | 470<br>(59.95%) | 303<br>(38.65%) | 11 (1.40%)     | <0.001 | <0.001            | TT + TC vs.<br>CC      | 1.21×10 <sup>-11</sup> | 3.83×10 <sup>-11</sup> | 14.51 (6.70–31.45)                  | 1.19×10 <sup>-11</sup> <sub>1</sub> | 2.19×10 <sup>-11</sup> <sub>1</sub> | 15.14 (6.90–33.21) |
| B27<br>negative      | 124 (55.86%)  | 32<br>(28.83%)  | 60<br>(54.05%)  | 19<br>(17.12%) |        | TT vs. TC +<br>CC | 3.83×10 <sup>-9</sup>  | 8.62×10 <sup>-9</sup>  | 3.70 (2.39–5.71)       | 2.46×10 <sup>-9</sup>               | 6.71×10 <sup>-9</sup>               | 3.79 (2.45–5.88)                    |                    |
| rs1051799<br>(C/G)   | C             | CC              | CG              | GG             |        | Additive          | 9.50×10 <sup>-12</sup> | 1.74×10 <sup>-11</sup> | 3.39 (2.39–4.82)       | 7.41×10 <sup>-12</sup> <sub>2</sub> | 1.63×10 <sup>-12</sup> <sub>1</sub> | 3.46 (2.43–4.94)                    |                    |
| B27<br>positive      | 1303 (83.10%) | 529<br>(67.47%) | 245<br>(31.25%) | 10 (1.28%)     | <0.001 | <0.001            | CC + CG<br>vs. GG      | 1.91×10 <sup>-6</sup>  | 2.79×10 <sup>-6</sup>  | 8.51 (3.53–20.55)                   | 1.92×10 <sup>-6</sup>               | 2.22×10 <sup>-6</sup>               | 8.80 (3.60–21.55)  |
| B27<br>negative      | 141 (63.51%)  | 41<br>(36.94%)  | 59<br>(53.15%)  | 11 (9.91%)     |        | CC vs. CG<br>+ GG | 2.02×10 <sup>-9</sup>  | 7.42×10 <sup>-9</sup>  | 3.54 (2.34–5.36)       | 1.47×10 <sup>-9</sup>               | 6.71×10 <sup>-9</sup>               | 3.62 (2.39–5.49)                    |                    |
| rs4155461<br>6 (C/G) | C             | CC              | CG              | GG             |        | Additive          | 0.0002                 | 0.0003                 | 3.22 (1.74–5.93)       | 0.0002                              | 0.0003                              | 3.26 (1.76–6.04)                    |                    |
| B27<br>positive      | 1531 (97.64%) | 748<br>(95.41%) | 35 (4.46%)      | 1 (0.13%)      | 0.0006 | 0.0010            | CC + CG<br>vs. GG      | 0                      | 0                      | 0.00 (0.00–0.00)                    | 0                                   | 0                                   | 0.00 (0.00–0.00)   |
| B27<br>negative      | 206 (92.79%)  | 95<br>(85.59%)  | 16<br>(14.41%)  | 0 (0.00%)      |        | CC vs. CG<br>+ GG | 8.88×10 <sup>-5</sup>  | 0.0001                 | 3.50 (1.87–6.55)       | 9.27×10 <sup>-5</sup>               | 0.0002                              | 3.54 (1.88–6.66)                    |                    |
| rs1063635<br>(G/A)   | G             | GG              | GA              | AA             |        | Additive          | 1.93×10 <sup>-14</sup> | 8.51×10 <sup>-14</sup> | 4.12 (2.87–5.92)       | 1.04×10 <sup>-14</sup> <sub>4</sub> | 7.61×10 <sup>-14</sup> <sub>4</sub> | 4.26 (2.95–6.15)                    |                    |
| B27<br>positive      | 1234 (78.70%) | 460<br>(58.67%) | 314<br>(40.05%) | 10 (1.28%)     | <0.001 | <0.001            | GG + GA<br>vs. AA      | 4.70×10 <sup>-13</sup> | 1.79×10 <sup>-12</sup> | 18.06 (8.25–39.56)                  | 4.03×10 <sup>-13</sup> <sub>3</sub> | 8.05×10 <sup>-13</sup> <sub>3</sub> | 19.08 (8.60–42.33) |
| B27<br>negative      | 122 (54.95%)  | 32<br>(28.83%)  | 58<br>(52.25%)  | 21<br>(18.92%) |        | GG vs. GA<br>+ AA | 1.55×10 <sup>-8</sup>  | 2.43×10 <sup>-8</sup>  | 3.51 (2.27–5.41)       | 7.93×10 <sup>-9</sup>               | 1.45×10 <sup>-8</sup>               | 3.64 (2.35–5.64)                    |                    |

\*P<sub>Trend</sub> indicates the *p*-value from the Cochran–Armitage trend test with 10,000 permutations. *MICA* cSNP rs1063630T>G, rs1063631T>G, rs1051786A>G, rs1051792G>A, rs1051794G>A, rs1131896G>A, rs1051796C>T, rs1051797C>T, rs1140700T>C, rs1051799C>T, rs1063635G>A were significantly associated with *HLA*–B27 positivity in AS patients.

**Table S6.** Comparison of *MICA* alleles between AS patients and normal controls with *HLA*–B27 positive individuals.

| MICA Allele        | Estimated Frequency Trend Test |                   |                | Logistic Regression    |                  | Logistic Regression Adjusted for Sex |                  |
|--------------------|--------------------------------|-------------------|----------------|------------------------|------------------|--------------------------------------|------------------|
|                    | AS (2N = 1568)                 | Control (2N = 82) | <i>p</i> value | P <sub>FDR</sub> value | OR (95% CI)      | P <sub>FDR</sub> Value               | OR (95% CI)      |
| <b>MICA*019:01</b> | 746 (47.58%)                   | 29 (35.37%)       | 0.005          | 0.011                  | 2.85 (1.52–5.35) | 0.012                                | 2.84 (1.51–5.33) |

|                       |              |             |       |       |                   |       |                   |
|-----------------------|--------------|-------------|-------|-------|-------------------|-------|-------------------|
| <b>MICA*008:01:01</b> | 274 (17.47%) | 22 (26.83%) | 0.034 | 0.114 | 0.53 (0.30–0.92)  | 0.109 | 0.52 (0.30–0.91)  |
| <b>MICA*010:01</b>    | 148 (9.44%)  | 7 (8.54%)   | 1     | 0.861 | 1.13 (0.49–2.58)  | 0.871 | 1.12 (0.49–2.57)  |
| <b>MICA*002:01</b>    | 138 (8.80%)  | 8 (9.76%)   | 1     | 0.861 | 0.89 (0.41–1.93)  | 0.871 | 0.89 (0.41–1.93)  |
| <b>MICA*004</b>       | 57 (3.64%)   | 5 (6.10%)   | 0.350 | 0.499 | 0.56 (0.21–1.49)  | 0.514 | 0.57 (0.21–1.51)  |
| <b>MICA*012:01</b>    | 47 (3.00%)   | 6 (7.32%)   | 0.075 | 0.114 | 0.37 (0.15–0.93)  | 0.113 | 0.37 (0.15–0.93)  |
| <b>MICA*045</b>       | 35 (2.23%)   | 1 (1.22%)   | 0.949 | 0.791 | 1.82 (0.25–13.20) | 0.763 | 1.88 (0.26–13.63) |
| <b>MICA*033</b>       | 39 (2.49%)   | 1 (1.22%)   | 0.832 | 0.791 | 2.04 (0.28–14.83) | 0.763 | 2.00 (0.27–14.51) |
| <b>MICA*007:01</b>    | 24 (1.53%)   | 0 (0.00%)   | 0.832 | 0.999 | 1(0.00–Inf)       | 0.999 | 1(0.00–Inf)       |
| <b>MICA*018:01</b>    | 4 (0.26%)    | 1 (1.22%)   | 0.442 | 0.402 | 0.21 (0.02–1.88)  | 0.353 | 0.19 (0.02–1.74)  |
| <b>others</b>         | 56 (3.57%)   | 2 (2.44%)   |       |       |                   |       |                   |

**Table S7.** Comparison of *MICA* alleles between AS patients and normal controls with HLA-B27 negative individuals.

| <b>MICA Allele</b>    | <b>Estimated Frequency Trend Test</b> |                            |                | <b>Logistic regression</b>   |                    | <b>Logistic Regression Adjusted for Sex</b> |                    |
|-----------------------|---------------------------------------|----------------------------|----------------|------------------------------|--------------------|---------------------------------------------|--------------------|
|                       | <b>AS(2N = 222)</b>                   | <b>Control (2N =1 676)</b> | <b>p Value</b> | <b>P<sub>FDR</sub> Value</b> | <b>OR (95% CI)</b> | <b>P<sub>FDR</sub> Value</b>                | <b>OR (95% CI)</b> |
| <b>MICA*019:01</b>    | 19 (8.56%)                            | 127 (7.58%)                | 0.687          | 0.864                        | 1.14 (0.69 – 1.90) | 0.925                                       | 1.11 (0.67 – 1.86) |
| <b>MICA*008:01:01</b> | 58 (26.13%)                           | 480 (28.64%)               | 0.437          | 0.864                        | 0.88 (0.65 – 1.21) | 0.917                                       | 0.86 (0.63 – 1.19) |
| <b>MICA*010:01</b>    | 44 (19.82%)                           | 265 (15.81%)               | 0.121          | 0.402                        | 1.34 (0.93–1.93)   | 0.392                                       | 1.34 (0.93–1.93)   |
| <b>MICA*002:01</b>    | 52 (23.42%)                           | 366 (21.84%)               | 0.585          | 0.864                        | 1.09 (0.79–1.53)   | 0.925                                       | 1.09 (0.78–1.53)   |
| <b>MICA*004</b>       | 16 (7.21%)                            | 125 (7.46%)                | 0.893          | 0.996                        | 0.97 (0.57–1.63)   | 0.999                                       | 1.03 (0.61–1.74)   |
| <b>MICA*012:01</b>    | 8 (3.60%)                             | 135 (8.05%)                | 0.019          | 0.122                        | 0.44 (0.21–0.90)   | 0.145                                       | 0.45 (0.22–0.92)   |
| <b>MICA*045</b>       | 16 (7.21%)                            | 61 (3.64%)                 | 0.025          | 0.122                        | 2.04 (1.16–3.61)   | 0.083                                       | 2.17 (1.22–3.86)   |
| <b>MICA*033</b>       | 0 (0.00%)                             | 1 (0.06%)                  | 0.025          | 0.999                        | 0.00 (0.00–Inf)    | 0.999                                       | 0.00 (0.00–Inf)    |
| <b>MICA*007:01</b>    | 2 (0.90%)                             | 18 (1.07%)                 | 1              | 0.996                        | 0.84 (0.19–3.65)   | 0.925                                       | 0.78 (0.18–3.44)   |
| <b>MICA*018:01</b>    | 1 (0.45%)                             | 3 (0.18%)                  | 0.786          | 0.864                        | 2.53 (0.26–24.54)  | 0.925                                       | 1.96 (0.19–19.71)  |
| <b>other</b>          | 6 (2.70%)                             | 95 (5.67%)                 |                |                              |                    |                                             |                    |
